# Supplementary material
Source: PubMed Central journal article supplement (PMC2756873)
Supplement: supp_29_20_5564__1.pdf [file supp_29_20_5564__1.pdf]

FIG. S1. All PTB antibodies detect PTB re-localization to the cytoplasm of MEFs adhering to fibronectin. (A) MEFs grown overnight were fixed and stained with the indicated antibodies. In the fully spread MEFs all PTB antibodies detect PTB mostly in the nucleus. (B) MEFs were lifted and maintained in suspension and replated on fibronectin. Cells adhered for 12 min and were fixed and stained with the indicated antibodies. Arrowheads indicate PTB vinculin co-localization at possible spreading initiation centers. Scale bars are 20  $\mu\text{m}$ .

FIG. S2. MEFs transfected with shPTB(A) show decreased cell spreading and fewer protrusions. (A) MEFs were transfected with shPTB(A) and EGFP or empty vector and EGFP. After 3 days cells were lifted and re-adhered to fibronectin for 90 min. The cells were fixed and stained for PTB and vinculin. Arrowheads identify transfected cells. (B) Quantitation of cell surface area of transfected cells (n=50 for control and n=48 for shPTB(A)). The red bar in the plot shows the mean, and asterisks indicate statistical significance measured by paired *t*-test (\*\*\*)P<0.0001). (C) Cells were also scored for number of protrusions formed during spreading. The graph shows the percent of transfected cells having 5 or more protrusions or less than 5 protrusions. Scale bars are 20  $\mu$ m.

FIG. S3. MEFs overexpressing PTB show increased cell spreading. (A) MEFs were transfected with myc tagged PTB or empty vector along with EGFP. After 2 days cells were lifted and re-adhered to fibronectin for 90 min. The cells were fixed and stained for myc and vinculin. Arrowheads identify transfected cells. (B) Quantitation of cell surface area for EGFP and myc-PTB or EGFP and empty vector transfected cells (n=51 for control and n=51 for PTB transfected cells). The red bar in the plot shows the mean, and asterisks indicate statistical significance measured by paired *t*-test (\*\*\*)P<0.0002). Scale bars are 20  $\mu$ m.

FIG. S4. PTB co-localizes with vinculin mRNA in protrusions formed during early cell spreading. Cells were lifted and maintained in suspension for 1 hour and replated on fibronectin. After 20 min adhered cells were fixed and immunofluorescence performed with anti-PTB (CT) antibody. Cells were post-fixed with PFA and *in situ* hybridization was performed with Cy3 labeled vinculin ribo-probes-3 and -5 combined. Shown are 3 representative images. The arrowhead in the enlarged image identifies regions of co-localization in newly formed protrusions. Scale bars are 20  $\mu\text{m}$  except in the enlarged images to the right which are 5  $\mu\text{m}$ .

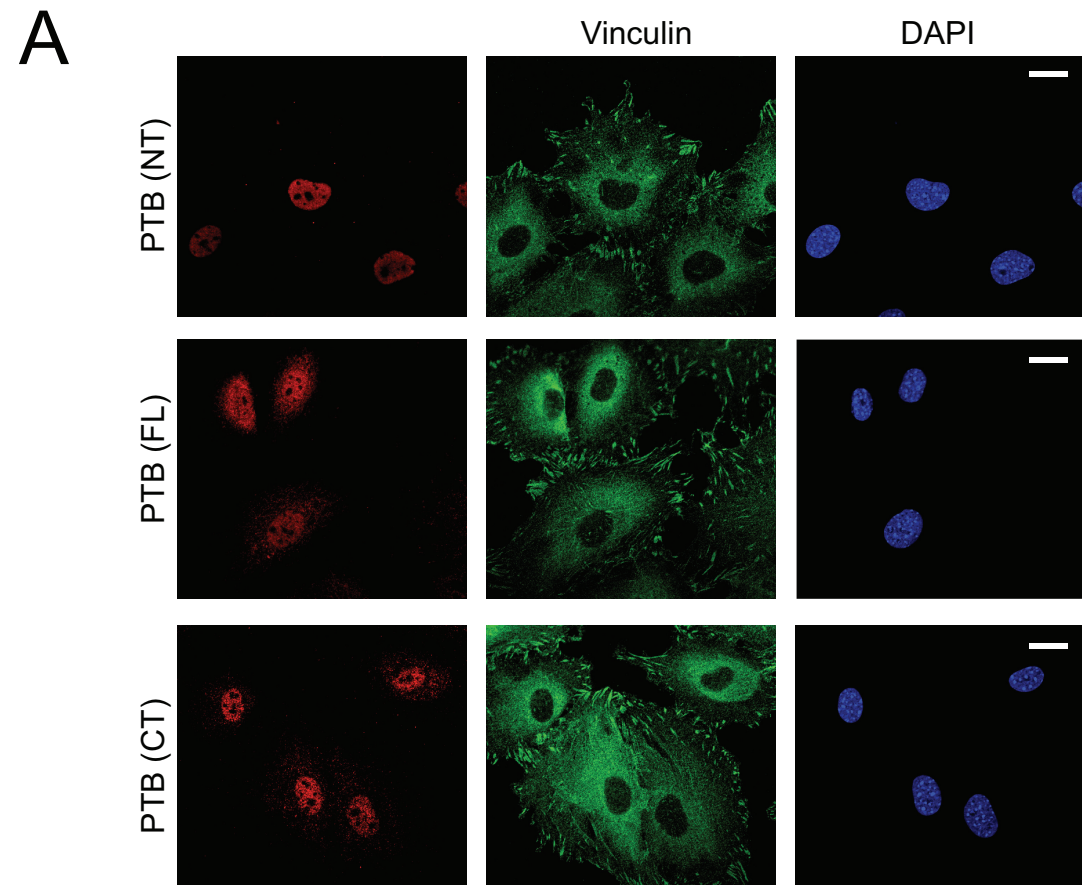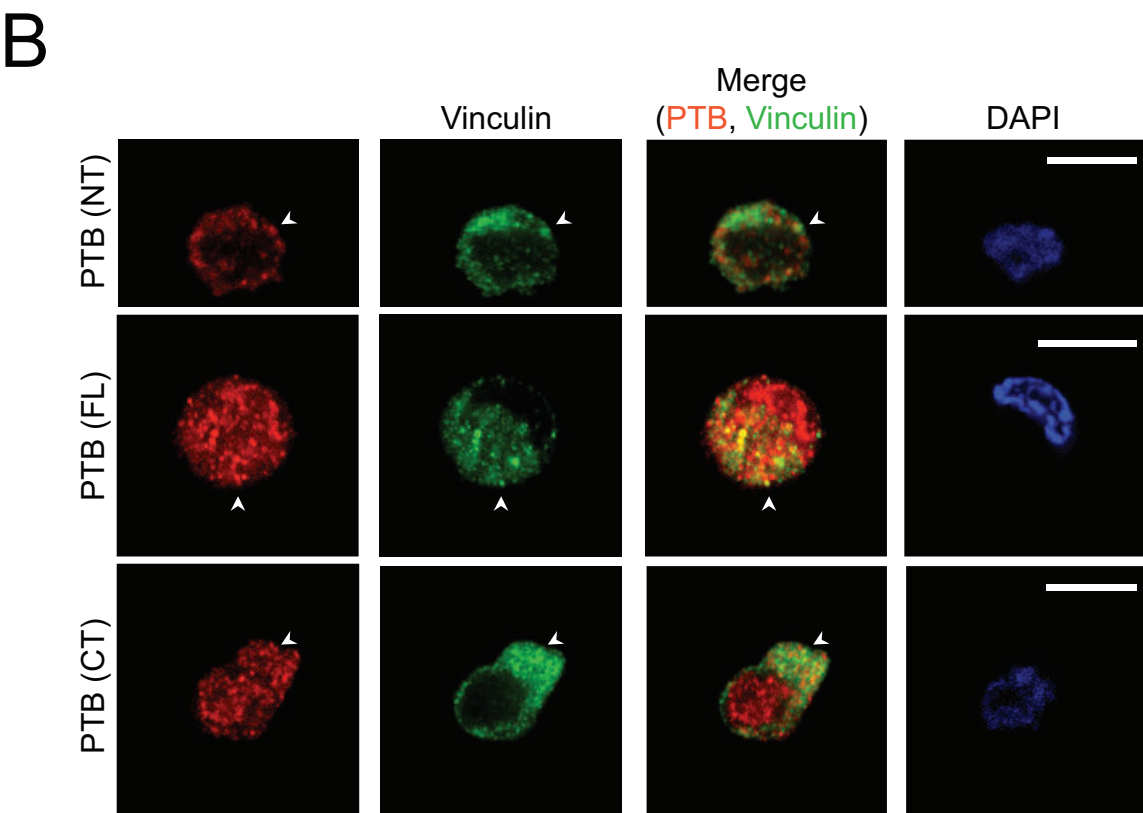

Figure S1

**A**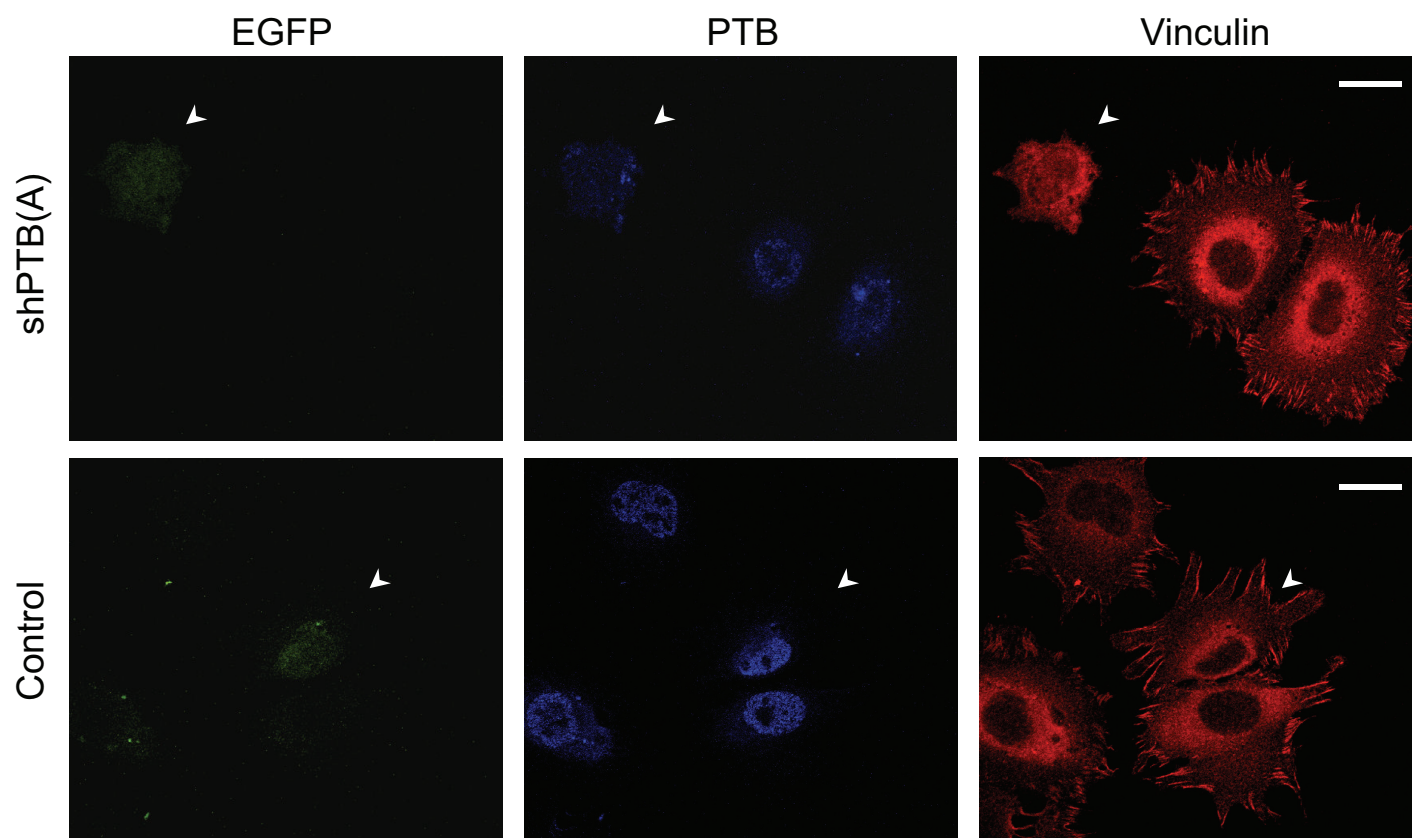**B**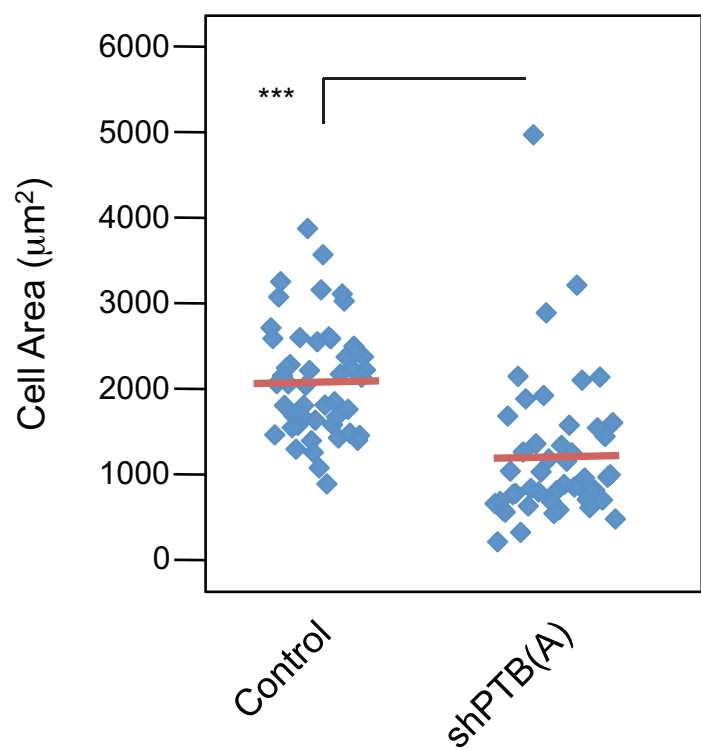**C**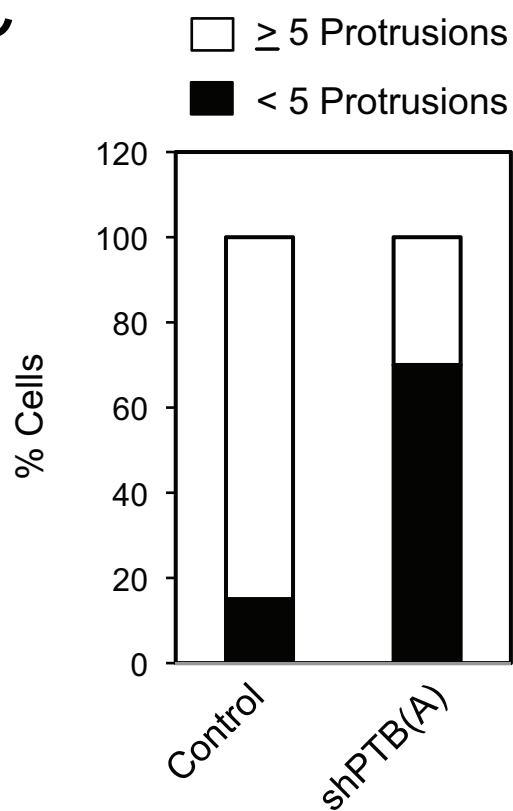

Figure S2

**A**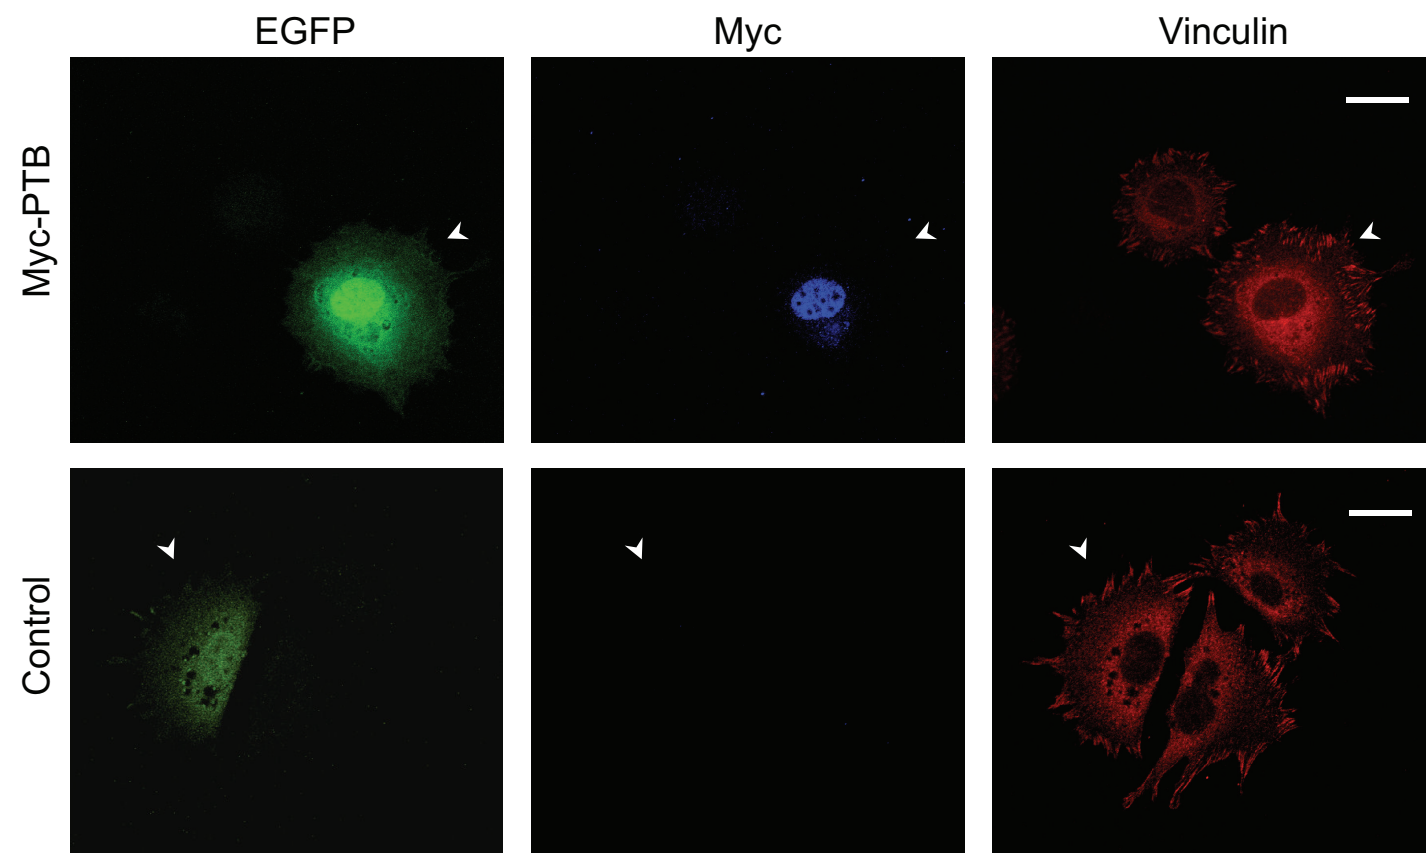**B**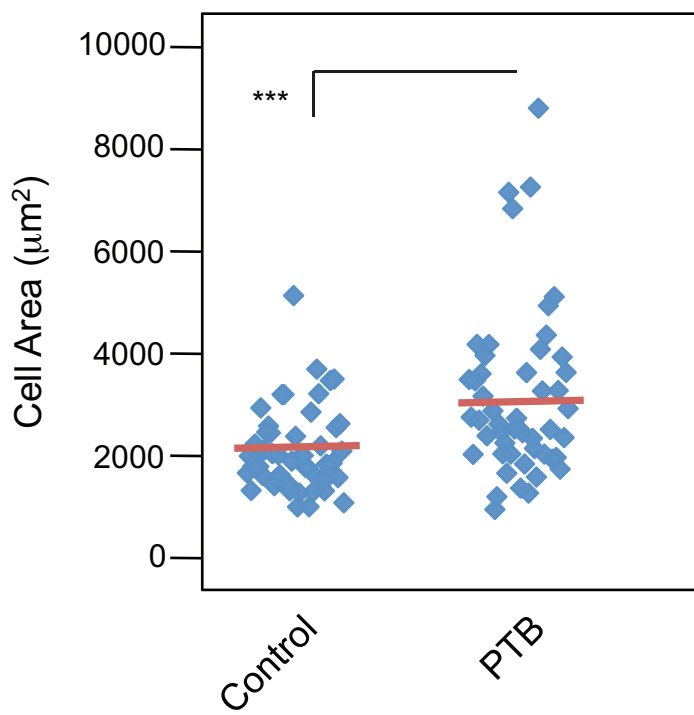

Figure S3

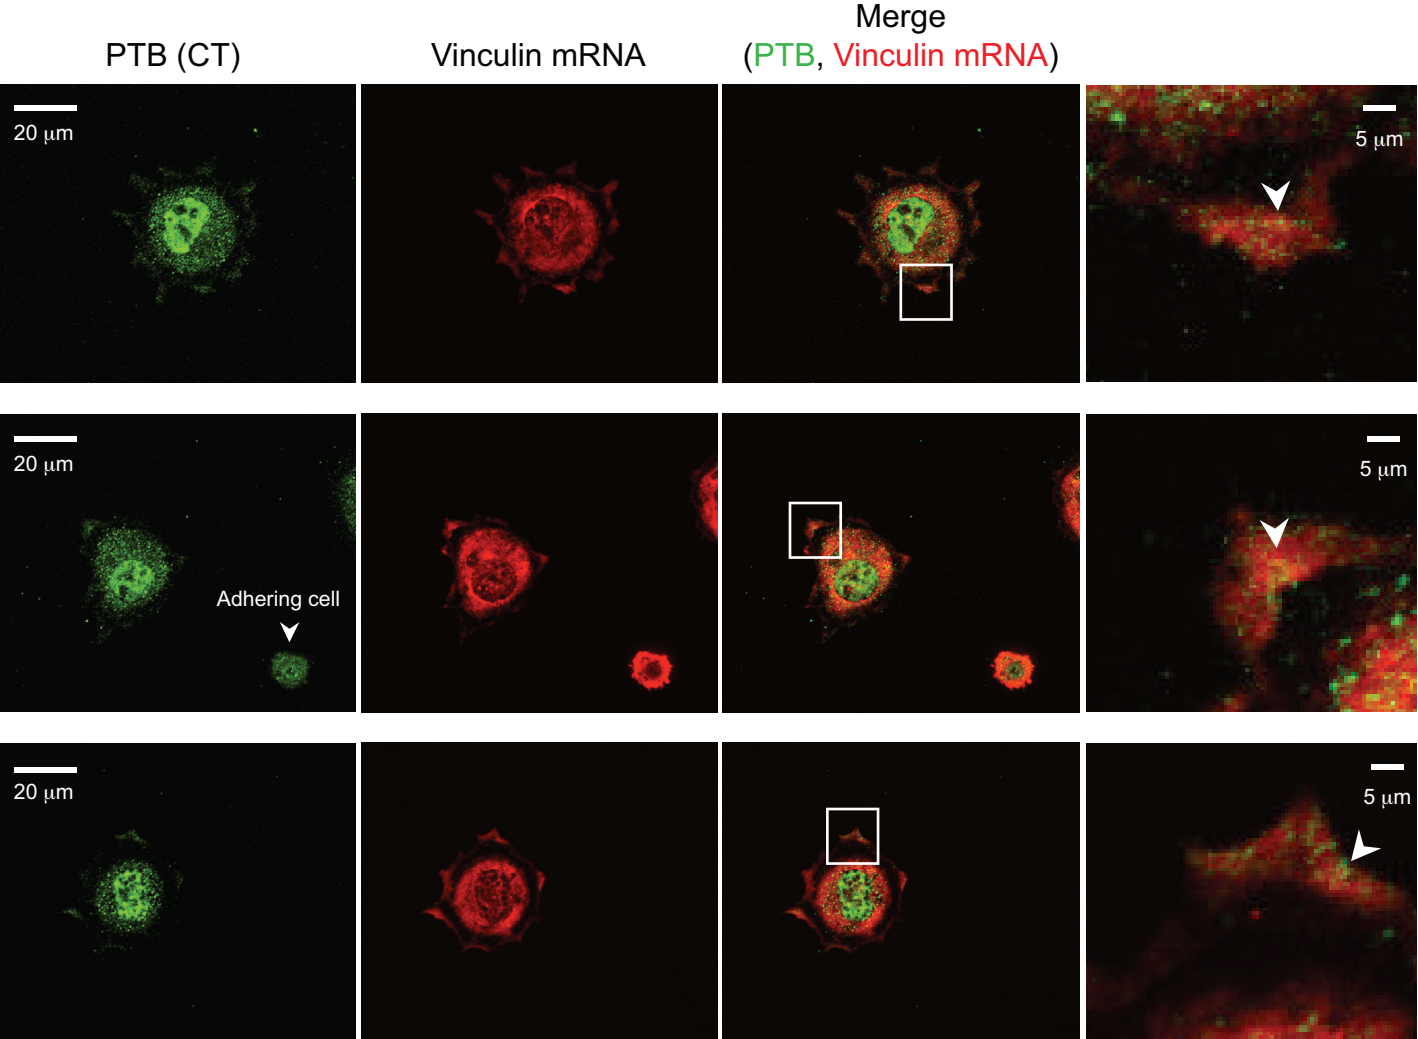

Figure S4
